# Supplementary material
Source: publisher figshare collection journal article supplement (https://diabetesjournals.figshare.com/articles/dataset/_/22190029)
Supplement: Supplementary file 1 [file 1]

## **ONLINE APPENDIX. Type 1 Diabetes TrialNet Study Group.**

### **Personnel as of 1/12/2022.**

**Steering Committee:** Kevan Herold (Yale University), Mark Anderson (University of California, San Francisco), Mark A. Atkinson (University of Florida), Todd Brusko (University of Florida), Jane Buckner (Benaroya Research Institute), Mark Clements (The Children's Mercy Hospital), Peter G. Colman (Walter & Eliza Hall Institute of Medical Research), Mark Daniels (Children's Hospital of Orange County), Linda DiMeglio (Indiana University), Carmella Evans-Molina (Indiana University), Jason Gaglia (Joslin Diabetes Center), Stephen E. Gitelman (University of California, San Francisco), Robin Goland (Columbia University), Peter Gottlieb (Barbara Davis Center for Childhood Diabetes), Michael Haller (University of Florida), Carla J. Greenbaum (Benaroya Research Institute), Martin Hessner (Medical College of Wisconsin), Jeffrey P. Krischer (University of South Florida), Megan Levings (University of British Columbia), Ingrid Libman (University of Pittsburgh), Peter Linsley (Benaroya Research Institute), Alice Long (Benaroya Research Institute), Sandra Lord (Benaroya Research Institute), Wayne Moore (The Children's Mercy Hospital), Antoinette Moran (University of Minnesota), Andrew Muir (Emory Children's Center), Priya Pralahad (Stanford University), William Russell (Vanderbilt Eskind Diabetes Clinic), Jennifer Sherr (Yale University), Lisa Spain (National Institute of Diabetes and Digestive and Kidney Diseases [NIDDK]), Andrea Steck (Barbara Davis Center for Childhood Diabetes), John Wentworth (Walter & Eliza Hall Institute of Medical Research), Diane Wherrett (University of Toronto), Perrin White (University of Texas Southwestern), Darrell M. Wilson (Stanford University), William Winter (University of Florida).

**Past Members:** Peter Antinozzi (Wake Forest University), David A. Baidal (University of Miami), Manuela Battaglia (San Raffaele University), Dorothy Becker (University of Pittsburgh), Penelope Bingley (University of Bristol), Emanuele Bosi (San Raffaele University), Richard Insel (JDRF), Thomas Kay (St. Vincent's Institute of Medical Research), Mikael Knip (University of Helsinki), Åke Lernmark (Skane University Hospital), Yuk-Fun Liu (University of Bristol), Jennifer B. Marks (University of Miami), Jerry Palmer (University of Washington), Mark Peakman (King's College), Louis Philipson (University of Chicago), Alberto Pugliese (University of Miami), Philip Raskin (University of Texas Southwestern), Maria Redondo (Baylor College of Medicine), Henry Rodriguez (University of South Florida Diabetes and Endocrinology Center), Bart Roep (Leiden University Medical Center), Desmond A. Schatz (University of Florida), Jay S. Skyler (University of Miami), Jay M. Sosenko (University of Miami), Jorma Toppari (Hospital District of Southwest Finland), Anette Ziegler (Technical University Munich).

**Executive Committee:** Kevan Herold, (Yale University), Carla J. Greenbaum (Benaroya Research Institute), Jeffrey P. Krischer (University of South Florida), Ellen Leschek (National Institute of Diabetes and Digestive and Kidney Diseases [NIDDK]), Lisa Spain (National Institute of Diabetes and Digestive and Kidney Diseases [NIDDK]).

**Past Members:** Katarzyna Bourcier (National Institute of Allergy and Infectious Diseases [NIAID]), Richard Insel (JDRF), John Ridge (National Institute of Allergy and Infectious Disease [NIAID]), Jay S. Skyler (University of Miami).

**Chair's Office:** Kevan Herold, (Yale University), Lisa Rafkin (University of Miami).

**Past Members:** Carla J. Greenbaum (Benaroya Research Institute), Irene Santiago (University of Miami), Jay S. Skyler (University of Miami), Jay M. Sosenko (University of Miami).

**TrialNet Coordinating Center (University of South Florida):** Jeffrey P. Krischer, Brian Bundy, Michael Abbondandolo, Rajesh Adusumalli, Logan Alford, Matthew Boonstra, , Jessica Conaty, David Cuthbertson, Julie Ford, Jennifer Garmeson, Veena Gowda, Cameron Hainline, Brian Hays, Kathleen Heyman, Christina Karges, Amy Kunz, Shu Liu, Kristin Maddox, Colleen Maguire, Margaret Moore, Sarah Muller, Melissa Murray, Johanna Nesbitt, Ryan O'Donnell, Melissa Parker, MJ Pereyra, Francisco Perez Laras, Aswani Raheja, Devon Rizzo, Lisa Steward, Michael Taylor, Roy Tamura, Dena Tewey, Elon Walker-Veras, Jianmei Wang, Melissa Wroble, Lili Wumser, Lu You, Kenneth Young.

**Past Members:** Timothy Adams, Darlene Amado, Ilma Asif, Jenna Bjellquist, Laura Bocchino, Cristina Burroughs, Mario Cleves, Meagan DeSalvatore, Christopher Eberhard, Steve Fiske, Susan Geyer, Courtney Henderson, Martha Henry, Belinda Hsiao, Amanda Kinderman, Beata-Gabriela Koziol, Lindsay Lane, Ashley Leinbach, Jennifer Lloyd, Jamie Malloy, Julie Martin, Cameron McNeill, Jessica Miller, Thuy Nguyen, Jodie Nunez, Nichole Reed, Amy Roberts, Kelly Sadler, Tina Stavros, Christine Sullivan, Megan V. Warnock, Keith Wood, Rebecca Wood, Ping Xu, Vanessa Yanek.

**National Institute of Diabetes and Digestive and Kidney Diseases [NIDDK]:** Ellen Leschek, Lisa Spain.

**Data Safety and Monitoring Board:** Emily Blumberg (University of Pennsylvania), Sean Aas (Georgetown University), Gerald Beck (Cleveland Clinic Foundation), Rose Gubitosi-Klug (Case Western Reserve University), Dennis Wallace (Retired).

**Past Members:** David Brillon (Cornell University), Lori Laffel (Joslin Diabetes Center), Robert Veatch (Georgetown University), Robert Vigersky (Medtronic).

**Infectious Disease Safety Committee:** Brett Loecheit (Children's National Medical Center), Lindsey Baden (Brigham and Women's Hospital), Peter Gottlieb (Barbara Davis Center for Childhood Diabetes), Michael Green (University of Pittsburgh), Ellen Leschek (National Institute of Diabetes and Digestive and Kidney Diseases [NIDDK]), Ingrid Libman (University of Pittsburgh), Adriana Weinberg (University of Colorado), John Wentworth (Walter & Eliza Hall Institute of Medical Research).

**Past Members:** Nora Bryant (Joslin Diabetes Center), Yuk-Fun Liu (University of Bristol).

**Laboratory Directors:** Michael Sheldon (Infinity BiologiX), Adriana Weinberg (University of Colorado), William Winter (University of Florida), Liping Yu (Barbara Davis Center for Childhood Diabetes).

**Past Members:** Santica Marcovina (University of Washington), Jerry P. Palmer (University of Washington), Jay Tischfield (Rutgers University).

**TrialNet Clinical Network Hub (Benaroya Research Institute):** Arielle Pagryzinski, Emily Batts, Mary Ramey, Diana Skye, Michele Staal.

**Past Members:** Annie Schultz, Kristin Fitzpatrick, Randy Guerra, Melita Romasco, Annie Shultz, Meghan Tobin, Christopher Webb.

**Active Personnel at Clinical Centers Participating in the TN01 Protocol:**

**Barbara Davis Center for Childhood Diabetes, Aurora, Colorado:** Andrea K. Steck, Brenda Bradfield, Tamara Carlin, Lexie Chesshir, Peter A. Gottlieb, Nancy Kunzie, Adam Magera, Aaron W. Michels, Kimber Simmons, Morgan Sooy, Taylor Triolo, Ruthie Williamson.

**Benaroya Research Institute, Seattle, Washington:** Carla J. Greenbaum, Jane H. Buckner, Ross Christy, Sadiq El' Amin-White, Wei Hao, David Kook, Sandra Lord, Bao Ng, Mary Ramey, Michael Richter, Elaine Sachter, Corinna Tordillos, Dana VanBuecken, Kimberly Varner, Heather White, Nancy Wickstrom, Cassandra Williams.

**The Children's Hospital of Orange County:** Amrit Bhangoo, Mark Daniels, Daina Dreimane, Mark Daniels, Marissa Erickson, Timothy Flannery, Nikta Forghani, Sarah Hu, Himala Kashmiri, Anabel Palencia, Christina Reh, Francoise Sutton, Heather Speer, Lien Trihn.

**The Children's Mercy Hospital, Kansas City, Missouri:** Wayne Moore, Fadi Al Muhaisen, Marissa Beidelschies, Jennifer Boyd, Darlene Brenson-Hughes, Mark Clements, Aliza Elrod, Katelyn Evans, Rachel Goff, Emily Haith, Kelsee Halpin, Kelsye Howell, Jennifer James, Laura Jones, Terri Luetjen, Cassandra McClain, Ryan McDonough, Susan Mitchell, Kathleen Noland, Emily Paprocki, Susan Parish, Rhiannon Pomerantz, Luis Sainz y Diaz, Cintya Schweisberger, Britaney Spartz.

**Columbia University, New York, New York:** Robin Goland, Magdalena Bogun, Rachelle Gandica, James Pring, Kristen Williams.

**Emory Children's Center, Atlanta, Georgia:** Andrew Muir, Amber Antich, Kristina Cossen, Eric Felner, Lynette Gonzalez, Wanda Sanchez, Catherine Simpson.

**The Hospital for Sick Children, Toronto, Ontario:** Diane K. Wherrett, Lesley Eisel, Roze Kovalakovska, Rebecca Stochinsky, Mary Jo Ricci.

**Indiana University, Indianapolis, Indiana:** Linda A. DiMeglio, Carmella Evans-Molina, Eric Grubbs, Heba M. Ismail, Megan Kirchner, Anna Neyman, Juan Sanchez, Emily K. Sims, Maria Spall, Stephanie Woerner.

**Stanford University, Stanford, California:** Darrell M. Wilson, Priya Prahalad, Tandy Aye, Laura Bachrach, Trudy Esrey.

**University of British Columbia, Kelowna, British Columbia:** Constadina Panagiotopoulos, Megan Levings, Daniel Metzger, Kimberley Chong, Ricky Thandi, Bianca Vizcaino, Brian Xu.

**University of California, San Francisco, California:** Stephen E. Gitelman, Fatema Abdulhussein, Natalie Aceves, Mark S. Anderson, Julissa Cabrera, Hannah Chessner, Abby Cobb-Walch, Laura Dapkus, Karen Ko, Janet Lee, Roger Long, Isabella Niu, Srinath Sanda, Caroline Schulmeister, Christine Torok, Rebecca Wesch, Jenise Wong.

**University of Florida, Gainesville, Florida:** Michael J. Haller, Mark A. Atkinson, Brittany Bruggeman, Todd M. Brusko, Kristin Dayton, Timothy Foster, Jennifer Hosford, Laura M. Jacobsen, Sarah Peeling, Desmond A. Schatz, Janet Silverstein, Malinda Tran, William E. Winter.

**University of Minnesota, Minneapolis, Minnesota:** Antoinette M. Moran, Shannon Beasley, Melena D. Bellin, Jane Kennedy, Janice Leschyshyn, Brandon M. Nathan, Beth Pappenfus, Ihsan Rizky.

**University of Pittsburgh, Pittsburgh, Pennsylvania:** Ingrid M. Libman, Dorothy J. Becker, Kelli DeLallo, Mary Beth Klein, Christine March, Karen Riley, Carly Shelleby, Frederico Toledo.

**University of Texas Southwestern, Dallas, Texas:** Perrin White, Abha Choudhary, Yasmin Dominguez, Lindsay Harter, Philip Raskin.

**Vanderbilt Eskind Diabetes Clinic, Nashville, Tennessee:** William E. Russell, Faith Brendle, Brenna Hammel, Jenny Leshko, Daniel J. Moore, Kimberly Rainer, Tyler Smith, Sarah Wright.

**Walter and Eliza Hall Institute of Medical Research, Parkville, Victoria:** Peter Colman, John M. Wentworth, Marika Bjorasen, Spiros Furlanos, Leonard C. Harrison, Felicity Healy, Leanne Redl.

**Yale University, New Haven, Connecticut:** Jennifer Sherr, Kevan C. Herold, Lori Carria, Laurie Feldman, William V. Tamborlane, Eileen Tichy, Stuart A. Weinzier, Kate Weyman
